# Supplementary material
Source: PubMed Central journal article supplement (PMC2864413)
Supplement: bgq039_1.pdf [file bgq039_1.pdf]

A

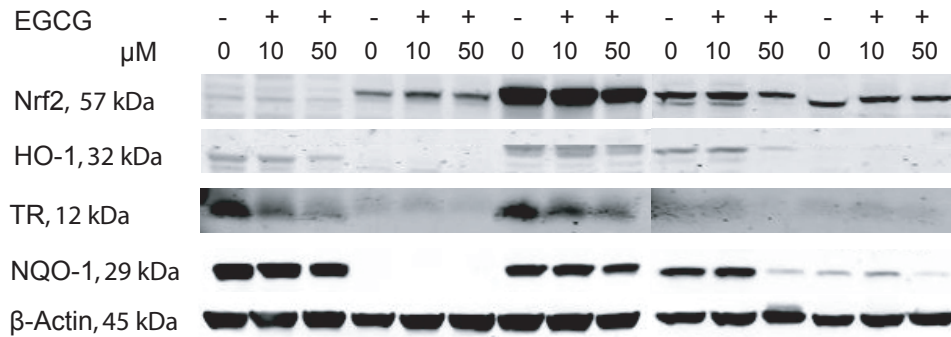

B

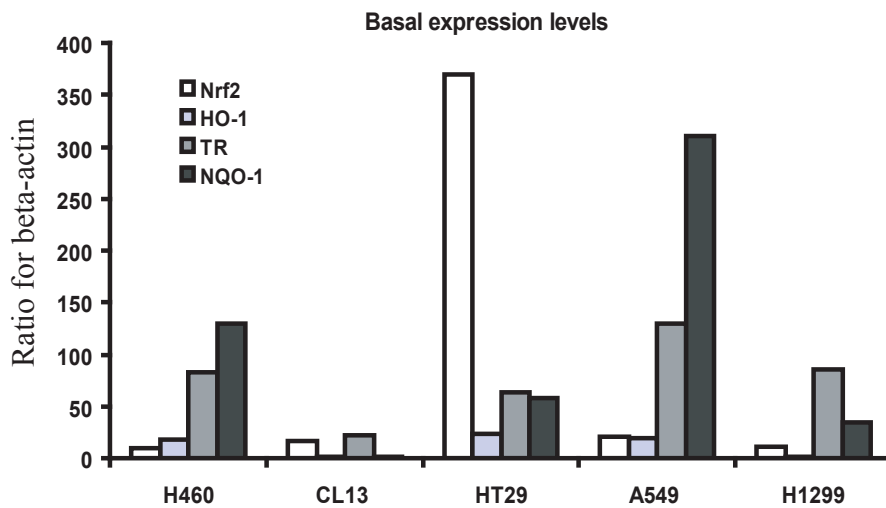

Figure S1. Effects of EGCG treatments on expression of antioxidant enzymes such as transcription factor NF-E2 related factor-2 (Nrf2), hemoxygenase-1 (HO-1), thioredoxin (TR), and NAD(P)H: quinone oxidoreductase 1 (NQO-1) in H460, CL13, HT29, A549, and H1299 cell lines. The cells were incubated in serum-free medium with 10 and 50  $\mu$ M EGCG for 24 h. (A) Western blots for Nrf2, HO-1, TR, and NQO-1 with 10 and 50  $\mu$ M EGCG for 24 h. (B) Comparison of Nrf2, HO-1, TR, and NQO-1 basal expression levels.
